# Supplementary material
Source: publisher site journal article supplement (https://evolsyst.pensoft.net/article/76879/download/suppl/31/)
Supplement: Supplementary file 1

SD1. GenBank access numbers of cricetid taxa used in the phylogenetic analyses.

| **Accesion number** | **Species** | **Voucher number** | **Reference** |
| --- | --- | --- | --- |
| GU126544 | *Scolomys juruaense* | INPA 2489 | Smith and Patton (1999) |
| EU579518 | *Scolomys ucayalensis* | AMNH 272721 | Hanson and Bradley (unpublished) |
| AF251520 | *Hylaemys yunganus* | JLP 15535 | Patton et al. (2000) |
| AF251522 | *Hylaeamys laticeps* | ML 101 | Patton et al. (2000) |
| AF108695 | *Hylaeamys megacephalus* | USNM549548 | Smith and Patton (1999) |
| EU579499 | *Hylaeamys megacephalus* | MHNLS 8061 | Hanson and Bradley (unpublished) |
| EF455033 | *Hylaeamys megacephalus* | MN 37814 | Miranda et al. (2007) |
| EU579489 | *Handleyomys alfaroi* | TK 93700 | Hanson and Bradley (unpublished) |
| KF658401 | *Handleyomys alfaroi* | CMCMEX 2246 | Almendra et al. (2014) |
| KF658381 | *Handleyomys chapmani* | CMCMEX 1352 | Almendra et al. (2014) |
| EU579494 | *Handleyomys saturatior* | ROM 101537 | Hanson and Bradley (unpublished) |
| KF658386 | *Handleyomys saturatior* | CURNJAGE 438 | Almendra et al. (2014) |
| AF181273 | *Euryoryzomys lamia* | CR B968 | Bonvicino and Moreira (2001) |
| AF251529 | *Euryoryzomys nitidus* | MSB 166027 | Patton et al. (2000) |
| EU579485 | *Euryoryzomys nitidus* | TK 14571 | Hanson and Bradley (unpublished) |
| EU579513 | *Transandinomys bolivaris* | TK135687 | Hanson and Bradley (unpublished) |
| EU579514 | *Transandinomys talamancae* | TK 135289 | Hanson and Bradley (unpublished) |
| GU126544 | *Transandinomys talamancae* | USNM 449894 | Percequillo et al. (2011) |
| AF251526 | *Euryoryzomys emonsae* | MZUSP 27150 | Patton et al. (2000) |
| EF455018 | *Euryoryzomys russatus* | LF 484 | Miranda et al. (2007) |
| AF251527 | *Euryoryzomys macconnelli* | MNFS 747 | Patton et al. (2000) |
| EU579507 | *Oecomys catherinae* | MF 29 | Hanson and Bradley (unpublished) |
| AJ496311 | *Oecomys rutilus* | V-889 | Mauffrey et al. (unpublished) |
| AJ496305 | *Oecomys auyantepui* | V-1001 | Mauffrey et al. (unpublished) |
| HM594591 | *Oecomys paricola* | UFMG 2841 | Rocha et al. (2011) |
| AY275123 | *Oecomys superans* | MVZ 155006 | D'Elia (2003) |
| JQ312124 | *Oecomys bicolor* | MVZ 154997 | Rocha et al. (2012) |
| HM594612 | *Oecomys cleberi* | LPC 665 | Rocha et al. (2012) |
| HM594615 | *Oecomys concolor* | JLP 16806 | Rocha et al. (2011) |
| EU579509 | *Oecomys mamorae* | JLP 16961 | Hanson and Bradley (unpublished) |
| GU126527 | *Oecomys trinitatis* | MUSM 13320 | Percequillo et al. (2011) |
| FJ361072 | *Oecomys roberti* | UFPB 494 | Miranda et al. (unpublished) |
| KR190457 | *Oecomys roberti* | FLV 107r | Rocha et al. (2015) |
| KY754067 | *Nephelomys keaysi* | MVZ 173987 | Steppan and Schenk (2017) |
| JF693875 | *Nephelomys levipes* | MVZ 171468 | Pine et al. (2012) |
| KY754068 | *Nephelomys levipes* | MVZ 166680 | Steppan and Schenk (2017) |
| DQ224407 | *Nephelomys moerex* | TEL 1447 | Amman et al. (unpublished) |
| KP778209 | *Nephelomys devius* | ROM 97301 | Almendra et al. (unpublished) |
| KP778275 | *Nephelomys devius* | ROM 97317 | Almendra et al. (unpublished) |
| EU579505 | *Nephelomys albigularis* | AMNH 268125 | Hanson and Bradley (unpublished) |
| KP778415 | *Nephelomys albigularis* | LSUMZ 6189 | Almendra et al. (unpublished) |
| KP778386 | *Nephelomys albigularis* | LSUMZ 6191 | Almendra et al. (unpublished) |
| KP778406 | *Nephelomys albigularis* | LSUMZ 6228 | Almendra et al. (unpublished) |
| --- | *Mindomys kutuku sp. nov* | MECN 5809 | This paper |
| MT700428 | *Mindomy hammondi* | ROM 1055820 | Brito et al. (2020) |
| MZ437999 | *Mindomys hammondi* | MECN 6228 | Brito et al. (2021) |
| MT700420 | *Pattonimus musseri* | MEPN 12587 | Brito et al. (2020) |
| MT700423 | *Pattonimus musseri* | MEPN 12586 | Brito et al. (2020) |
| MT700421 | *Pattonimus musseri* | MEPN 12593 | Brito et al. (2020) |
| MT700422 | *Pattonimus musseri* | MEPN 12605 | Brito et al. (2020) |
| MT700427 | *Pattonimus* sp. | QCAZ 8720 | Brito et al. (2020) |
| MT700418 | *Pattonimus ecominga* | MECN 5298 | Brito et al. (2020) |
| MT700419 | *Pattonimus ecominga* | MEPN 12092 | Brito et al. (2020) |
| MT700415 | *Pattonimus ecominga* | MECN 6041 | Brito et al. (2020) |
| MT700417 | *Pattonimus ecominga* | MECN 5927 | Brito et al. (2020) |
| MT700413 | *Pattonimus ecominga* | JBM 1688 | Brito et al. (2020) |
| MT700414 | *Pattonimus ecominga* | MECN 6040 | Brito et al. (2020) |
| MT700416 | *Pattonimus ecominga* | MECN 6042 | Brito et al. (2020) |
| FJ971254 | *Tanyuromys thomasleei* | TEL2033 | Hanson et al. (2009) |
| MG831951 | *Tanyuromys asphrastus* | KU 159021 | Timm et al. (2018) |
| MG831950 | *Tanyuromys asphrastus* | UCRCRI 1921 | Timm et al. (2018) |
| MG831952 | *Tanyuromys asphrastus* | USNM 541201 | Timm et al. (2018) |
| MH939281 | *Melanomys caliginosus* | JFD 01322 | Franco-Sierra et al. (unpublished) |
| EU340019 | *Melanomys caliginosus* | TK 135789 | Hanson and Bradley (2008) |
| EU340018 | *Melanomys chrysomelas* | TK 121427 | Hanson and Bradley (2008) |
| EU074633 | *Melanomys chrysomelas* | TK 121431 | Hanson and Bradley (unpublished) |
| EU579506 | *Nesoryzomys fernandinae* | ASNCH 10580 | Hanson and Bradley (unpublished) |
| EU579478 | *Aegialomys galapogensis* | ASK 4105 | Hanson and Bradley (unpublished) |
| AF181283 | *Nectomys squamipes* | CRB 540 | Bonvicino and Moreira (2001) |
| KP970131 | *Holochilus vulpinus* | MNHNURY 6213 | D'Elia et al. (2015) |
| EU579495 | *Holochilus brasiliensis* | GD 081 | Hanson and Bradley (unpublished) |
| EU579497 | *Holochilus sciureus* | NK 102248 | Hanson and Bradley (unpublished) |
| EU074631 | *Holochilus sp.* | TK 53509 | Hanson et al. (unpublished) |
| KP970125 | *Lundomys molitor* | EMG 1779 | D'Elia et al. (2015) |
| KP970126 | *Lundomys molitor* | MNHNURY 4292 | D'Elia et al. (2015) |
| EU579480 | *Amphinectomys savamis* | MV 97005 | Hanson and Bradley (unpublished) |
| EU258535 | *Microryzomys minutus* | MVZ 166666 | Hanson (unpublished) |
| AF108698 | *Microryzomys minutus* | MVZ 173975 | Smith and Patton (1999) |
| EU579502 | *Microryzomys minutus* | QCAZ 8353 | Hanson and Bradley (unpublished) |
| EU579510 | *Oreoryzomys balneator* | AMNH 268144 | Hanson and Bradley (unpublished) |
| U58391 | *Neacomys spinosus* | MNFS 1262 | Patton and da Silva (1995) |
| EU579504 | *Neacomys spinosus* | MVZ 155014 | Hanson and Bradley (unpublished) |
| U03535 | *Oligoryzomys longicaudus* | MVZ 155842 | Smith and Patton (1999) |
| EU579482 | *Cerradomys scotti* | TK 61881 | Hanson and Bradley (unpublished) |
| KR149677 | *Cerradomys goytaca* | NPM 358 | Tavares et al. (2016) |
| KR14967 | *Cerradomys goytaca* | NPM 364 | Tavares et al. (2016) |
| JQ966233 | *Oecomys catherinae* | UFE 247 | Machado et al. (2014) |
| U58382 | *Oecomys bicolor* | MNFS 1499 | Patton and da Silva (1995) |

REFERENCES

Almendra AL, Rogers DS, González-Cózatl FX. 2014. Molecular phylogenetics of the Handleyomys chapmani complex in Mesoamerica. Journal of Mammalogy 95:26-40.

Bradley RD., Edwards CW, Carroll DS, Kilpatrick CW. 2004. Phylogenetic relationships of neotomine-peromyscine rodents: based on DNA sequences from the mitochondrial cytochrome-b gene. Journal of Mammalogy 85:389-395.

Brito J., Koch C, Percequillo AR, Tinoco N, Weksler M, Pinto CM, Pardiñas UF. 2020. A new genus of oryzomyine rodents (Cricetidae, Sigmodontinae) with three new species from montane cloud forests, western Andean cordillera of Colombia and Ecuador. PeerJ, 8, e10247.

Brito J, Tinoco N, Curay J, Pardiñas UFJ (2021) New morphological data on the rare sigmodontine *Mindomys hammondi* (Rodentia, Cricetidae), an arboreal oryzomyine from north-western Andean montane forests. Neotropical Biology and Conservation 16: 397–410.

D’Elía G, Hanson JD, Mauldin MR, Teta P, Pardiñas UF. 2015. Molecular systematics of South American marsh rats of the genus Holochilus (Muroidea, Cricetidae, Sigmodontinae). Journal of Mammalogy 96:1081-1094.

Gonçalves PR, Almeida FC, Bonvicino CR. 2005. A new species of Wiedomys (Rodentia: Sigmodontinae) from Brazilian Cerrad. Mammalian Biology 70:46-60.

Patton JL, Da Silva MNF, Malcolm JR. 2000. Mammals of the Río Juruá and the evolutionary andecological diversification of Amazonia. Bulletin ofthe American Museum of Natural History 244:1-306.

Percequillo AR, Weksler M, Costa LP. 2011. A new genus and species of rodent from the Brazilian Atlantic Forest (Rodentia: Cricetidae: Sigmodontinae: Oryzomyini), with comments on oryzomyine biogeography. Zoological Journal of the Linnean Society 161:357–390.

Rocha RG, Fonseca C, Zhou Z, Leite YL, Costa LP. 2012. Taxonomic and conservation status of the elusive Oecomys cleberi (Rodentia, Sigmodontinae) from central Brazil. Mammalian Biology 77:414-419.

Schenk JJ, Rowe KC, Steppan SJ. 2013. Ecological opportunity and incumbency in the diversification of repeated continental colonizations by muroid rodents. Systematic biology 62:837-864.

Smith MF, Patton JL. 1993. The diversification of South American murid rodents: evidence from mitochondrial DNA sequence data for the akodontine tribe. Biological Journal of the Linnean Society 50:149–177.

Tavares WC, Pessôa LM, Seuánez HN. 2016. Systematics and acceleration of cranial evolution in Cerradomys (Rodentia, Cricetidae, Sigmodontinae) of Quaternary sandy plains in Southeastern Brazil. Journal of Mammalian Evolution 23:281-296.

Weksler M. 2003. Phylogeny of Neotropical oryzomyine rodents (Muridae: Sigmodontinae) based on the nuclear IRBP exon. Molecular Phylogenetics and Evolution 29:331–349.
